# Supplementary material
Source: publisher figshare collection journal article supplement (https://sage.figshare.com/ndownloader/files/13638281)
Supplement: Supplementary file 1 [file 13638281]

## Appendices

### Appendix A

#### Search Strategy on Medline:

- 1 disaster victims/ or refugees/ (8465)
- 2 "emigrants and immigrants"/ or undocumented immigrants/ or "transients and migrants"/ (18855)
- 3 "warfare and armed conflicts"/ or armed conflicts/ or afghan campaign 2001-/ or american civil war/ or american revolution/ or crimean war/ or french revolution/ or gulf war/ or iraq war, 2003-2011/ or korean war/ or russian-japanese war/ or september 11 terrorist attacks/ or spanish-american war, 1898/ or vietnam conflict/ or world war i/ or world war ii/ or warfare/ or biological warfare/ or bioterrorism/ or chemical warfare/ or chemical terrorism/ or nuclear warfare/ or psychological warfare/ or war crimes/ or ethnic cleansing/ or genocide/ or holocaust/ or war exposure/ or war-related injuries/ or disasters/ or emergencies/ or emergency shelter/ (98160)
- 4 (refugee? or ((displace\* or relocate\* or re-locate\*) adj2 (internal\* or people or person? or individual? or population? or nation? or children or family or families)) or (border? adj2 cross\*) or (disaster? adj2 (victim? or survivo?r?))).mp. [mp=title, abstract, original title, name of substance word, subject heading word, keyword heading word, protocol supplementary concept word, rare disease supplementary concept word, unique identifier, synonyms] (15296)
- 5 ((migrant? or immigrant? or emigrant? or migration? or emigration? or immigration? or innmigration? or outmigration? or transient?) and (war? or warfare? or disaster? or crisis or crises or conflict? or emergency or emergencies or (force? or forceful\* or coerc\*))).mp. [mp=title, abstract, original title, name of substance word, subject heading word, keyword heading word, protocol supplementary concept word, rare disease supplementary concept word, unique identifier, synonyms] (23393)  
Annotation: Removing the concept of force could be accompanied with the concept of force with the concept of migrants and all
- 6 2 and 3 (243)
- 7 1 or 6 (8605)
- 8 4 or 5 (37599)
- 9 7 or 8 (37605)
- 10 death/ or palliative care/ or terminal care/ or death certificates/ or mortality/ or attitude to death/ or palliative medicine/ or mortuary practice/ or burial/ or cemeteries/ or thanatology/ (137960)
- 11 ((life adj2 end) or death? or dying or thanatolog\* or mortality or mortalities or ((terminal or palliative or hospice) adj2 (care or caring or medication? or medicine)) or (funeral\* or (mortuar\* adj2 practice?) or burial? or cemeter\*))).mp. [mp=title, abstract, original title, name of substance word, subject heading word, keyword heading word, protocol supplementary

concept word, rare disease supplementary concept word, unique identifier, synonyms]  
(1362171)

12 10 or 11 (1362171)

13 9 and 12 (3171)

**Total number of records: 3171**

Search Strategy on Scopus:

( TITLE-ABS-KEY ( "end of life" OR death OR dying OR thanatolog\* OR mortality OR mortalities OR funeral OR "mortuary practice" OR burial OR cemetery OR (( terminal OR palliative OR hospice ) W/2 ( care OR caring OR medication? OR medicine ))) AND (( TITLE-ABS-KEY ( "refugees" OR "disaster victims" ) OR (( displace\* OR relocate\* OR re-locate\* ) W/2 ( internal\* OR people OR person OR individual OR population OR nation OR children OR family OR families ) ) OR ( border W/2 cross\* ))) OR (( TITLE-ABS-KEY ( migrant OR immigrant OR emigrant OR migration OR emigration OR immigration OR inmigration OR outmigration OR transient ) ) AND ( TITLE-ABS-KEY ( war OR warfare OR disaster OR crisis OR conflict OR emergency OR emergencies OR ( force\* OR coerc\* ) ) ) ) ) )

**Total number of records: 5666**

Search Strategy on CINAHL:

| #   | Query                                                                                                                                                                                                                                                                                                                                          | Results |
|-----|------------------------------------------------------------------------------------------------------------------------------------------------------------------------------------------------------------------------------------------------------------------------------------------------------------------------------------------------|---------|
| S13 | S11 AND S12                                                                                                                                                                                                                                                                                                                                    | 560     |
| S12 | S1 OR S8                                                                                                                                                                                                                                                                                                                                       | 250,885 |
| S11 | S2 OR S3 OR S4 OR S10                                                                                                                                                                                                                                                                                                                          | 12,228  |
| S10 | S5 AND S9                                                                                                                                                                                                                                                                                                                                      | 272     |
| S9  | S6 OR S7                                                                                                                                                                                                                                                                                                                                       | 22,863  |
| S8  | (MH "Attitude to Death") OR (MH "Death") OR (MH "Death Certificates") OR (MH "Death Counseling") OR (MH "Dying-Death Measures (Saba CCC)") OR (MH "Bereavement Support (Saba CCC)") OR (MH "Funeral Arrangements (Saba CCC)") OR (MH "Terminal Care (Saba CCC)+") OR (MH "Palliative Care") OR (MH "Terminal Care") OR (MH "Burial Practices") | Display |
| S7  | (MH "Disasters")                                                                                                                                                                                                                                                                                                                               | Display |

- S6 (MH "War+") OR (MH "Chemical Warfare") OR (MH "Military Deployment+") OR (MH "Overseas Deployment") OR (MH "Nuclear Warfare") OR (MH "War Crimes+") OR (MH "Holocaust") OR (MH "Terrorism+") OR (MH "Bioterrorism") Display
- S5 (MH "Transients and Migrants") OR (MH "Relocation") OR (MH "Emigration and Immigration") OR (MH "Residential Mobility+") OR (MH "Immigrants+") OR (MH "Immigrants, Illegal") Display
- S4 (MH "Refugees") OR (MH "Crime Victims") Display
- S3 TI (refugee# OR ((displace\* OR relocate\* OR re-locate\*) N2 (internal\* OR people OR person# OR individual# OR population# OR nation# OR children OR family OR families)) OR (border# N2 cross\*) OR (disaster# N2 (victim# OR survivor#))) OR AB (refugee# OR (displace\* N2 (internal\* OR people OR person# OR individual# OR population# OR nation# OR children OR family OR families)) OR (border# N2 cross\*) OR (disaster# N2 (victim# OR survivor#))) 5,214
- S2 TI ((migrant# OR immigrant# OR emigrant# OR migration# OR emigration# OR immigration# OR immigration# OR outmigration# OR transient#) AND (war# OR warfare# OR disaster# OR crisis OR crises OR conflict# OR emergency OR emergencies OR (force# OR forceful\* OR coerc\*))) OR AB ((migrant# OR immigrant# OR emigrant# OR migration# OR emigration# OR immigration# OR immigration# OR outmigration# OR transient#) AND (war# OR warfare# OR disaster# OR crisis OR crises OR conflict# OR emergency OR emergencies OR (force# OR forceful\* OR coerc\*))) 2,421
- S1 TI ((life N2 end) OR death# OR dying OR thanatolog\* OR mortality OR mortalities OR ((terminal OR palliative OR hospice) N2 (care OR caring OR medication# OR medicine)) OR (funeral\* OR (mortuar\* N2 practice#) OR burial# OR cemeter\*)) OR AB ((life N2 end) OR death# OR dying OR thanatolog\* OR mortality OR mortalities OR ((terminal OR palliative OR hospice) N2 (care OR caring OR medication# OR medicine)) OR (funeral\* OR (mortuar\* N2 practice#) OR burial# OR cemeter\*)) 229,764

**Total number of records: 560**

Search Strategy on JSTOR:

("refugee\* death\*"~25) OR ("refugee\* (palliative care)"~25) OR ("refugee\* (terminal care)"~25) OR ("refugee\* mortality"~25) OR ("refugee\* mortalities"~25) OR ("refugee\* (end of life)"~25) OR ("refugee\* thanatolog\*"~25) OR ("refugee\* funeral\*"~25) OR ("refugee\* cemeter\*"~25) OR ("refugee\* (mortuary practice\*)"~25) OR ("refugee\* burial\*"~25)

**Total number of records: 1756**

Search Strategy for Refworld:

Advanced search: "refugee\* death\* w/50"

Years: "1980" till "2017"

**Total number of records: 7510**

## Appendix B

Table 1: Paper characteristics

| First Author, Year | Institution/ Affiliation of first author                               | Country of affiliation of the first author | Last name of corresponding author | Country of affiliation of the corresponding author | Collaboration between academics/ non-academics (NGOs) | Journal                                                    | Type of Publication | Study Design               | Year study was conducted | Statement on conflict of interest | Ethical approval |
|--------------------|------------------------------------------------------------------------|--------------------------------------------|-----------------------------------|----------------------------------------------------|-------------------------------------------------------|------------------------------------------------------------|---------------------|----------------------------|--------------------------|-----------------------------------|------------------|
| Atwell, 2007       | Refugee Health Research Centre, La Trobe University                    | Not reported                               | Not reported                      | Not reported                                       | No                                                    | International Journal of Migration, Health and Social Care | Article             | Mixed Methods              | Not reported             | Not reported                      | Not reported     |
| Kemp, 2005         | Louise Herrington School of Nursing Baylor University, Dallas, TX      | Not reported                               | Kemp                              | Not reported                                       | No                                                    | Seminars in Oncology Nursing                               | Article             | Review (Literature review) | Not reported             | Not reported                      | Not reported     |
| Harrell-Bond, 1990 | Refugee Studies Programme, Queen Elizabeth House, University of Oxford | Not reported                               | Not reported                      | Not reported                                       | No                                                    | Journal of Refugee Studies                                 | Article             | Review (Literature review) | Not reported             | Not reported                      | Not reported     |

|                   |                                                                          |                |                          |                |    |                                         |         |                            |              |                                                            |                                                                                                                                                           |
|-------------------|--------------------------------------------------------------------------|----------------|--------------------------|----------------|----|-----------------------------------------|---------|----------------------------|--------------|------------------------------------------------------------|-----------------------------------------------------------------------------------------------------------------------------------------------------------|
| Becker, 2002      | Institute for Health and Aging, University of California, San Francisco. | USA            | same as the first author | USA            | No | Journal of Gerontology: SOCIAL SCIENCES | article | Qualitative study          | not reported | not reported                                               | The study protocol and consent form were approved by the Institutional Review Board, Committee on Human Research, University of California, San Francisco |
| ENGLUND, 1998     | Nordic Africa Institute                                                  | Sweden         | same as the first author | Sweden         | No | Elsevier Science                        | article | Review (Literature review) | 1992-1993    | not reported                                               | not reported                                                                                                                                              |
| Hiruy, 2014       | Institute for Regional Development, University of Tasmania               | Australia      | same as the first author | Australia      | No | nursing ethics (SAGE)                   | article | Review (Literature review) |              | The authors declare that there is no conflict of interest. | not reported                                                                                                                                              |
| Kristiansen, 2015 | Qatar University, University of Copenhagen                               | Qatar, denmark | same as the first author | Qatar, Denmark | No | J Relig Health                          | article | Narrative                  | 2011         | not reported                                               | not reported                                                                                                                                              |

## Appendix C

Table 2: Characteristics of the research

| First Author, Year of Publication | Characteristics of the refugees/displaced |              | Characteristics of displacement |                                                                    |                                                                      | Timeframe of the war | Type of residency location of refugees (i.e. Camps, Households, Other) | Topic of the study (i.e. Death arrangement including burial, cultural/religious aspects, Access to medical/palliative care, Grief/Mourning, Other)                                                       | Quote about the experience of death/dying/end of life |
|-----------------------------------|-------------------------------------------|--------------|---------------------------------|--------------------------------------------------------------------|----------------------------------------------------------------------|----------------------|------------------------------------------------------------------------|----------------------------------------------------------------------------------------------------------------------------------------------------------------------------------------------------------|-------------------------------------------------------|
|                                   | Nationality                               | Age group    | Internal/External               | Country/combination of countries and Area from where refugees fled | Country/combination of countries and Area where the refugees settled |                      |                                                                        |                                                                                                                                                                                                          |                                                       |
| Atwell, 2007                      | More than one                             | Old          | External                        | 14 countries from Europe -South-East Asia - Africa - Middle East   | Melbourne, Australia                                                 | Not Reported         | Not Reported                                                           | Access to medical/palliative care                                                                                                                                                                        |                                                       |
| Kemp, 2005                        | More than one                             | Not Reported | External                        | Not Reported                                                       | United States                                                        | Not Reported         | Not Reported                                                           | Influence of culture on end of life experiences of refugee patients, their families and healthcare providers (including medical/palliative care, pain/suffering, grief/mourning, dying/death and burial) |                                                       |

|                    |              |              |              |                               |                                           |              |              |                                                                                                                                                       |
|--------------------|--------------|--------------|--------------|-------------------------------|-------------------------------------------|--------------|--------------|-------------------------------------------------------------------------------------------------------------------------------------------------------|
| Harrell-Bond, 1990 | Not Reported | Not Reported | Not Reported | Africa (Uganda & Mozambique ) | Africa (Malawi, Sudan, Zimbabwe & Zambia) | Not Reported | Not Reported | Influence of culture on end of life experiences (including grief/mourning, funeral and burial) - Challenges of end of life experiences among refugees |
|--------------------|--------------|--------------|--------------|-------------------------------|-------------------------------------------|--------------|--------------|-------------------------------------------------------------------------------------------------------------------------------------------------------|

|              |                                            |              |          |                       |     |                                                                                                                                                                                            |                                                                                                                                                                                                                                                                                                                                                                                                                                                                                   |                                                                                                                                                                                                                                 |                                                                                                                                                                                                                                                                                                                                                                                                                                                                                                                                                                                    |
|--------------|--------------------------------------------|--------------|----------|-----------------------|-----|--------------------------------------------------------------------------------------------------------------------------------------------------------------------------------------------|-----------------------------------------------------------------------------------------------------------------------------------------------------------------------------------------------------------------------------------------------------------------------------------------------------------------------------------------------------------------------------------------------------------------------------------------------------------------------------------|---------------------------------------------------------------------------------------------------------------------------------------------------------------------------------------------------------------------------------|------------------------------------------------------------------------------------------------------------------------------------------------------------------------------------------------------------------------------------------------------------------------------------------------------------------------------------------------------------------------------------------------------------------------------------------------------------------------------------------------------------------------------------------------------------------------------------|
| Becker, 2002 | Filipino Americans and Cambodian Americans | 50 and older | External | Philippines, Cambodia | USA | <p>- cambodians: during the Communist Khmer Rouge regime in the late 1970s</p> <p>- filipinos: Filipino American veterans of World War II and their wives who immigrated in late life.</p> | <p>lived in an innercity locale in a major urban area that also has large numbers of homeless people. Densely populated, this area has a high crime rate, and elders seldom venture out after dark. Cambodians lived with their extended families in <b>small apartments</b>, whereas Filipinos lived with their spouse and/or with other Filipinos in <b>small apartments or single-room-occupancy hotels</b>. A small proportion of Cambodians and Filipinos lived in urban</p> | <p>contextualize the anticipation of death by transmigrants: The purpose was to examine how Cambodian Americans and Filipino Americans view their homeland in old age and how those views affect the contemplation of death</p> | <p>"My husband just died in May. I was able to bring him home. I went on vacation. He was sick for four years. I had such a hard time here because I was the one doing everything. He had cancer in the pancreas. The doctors spoke to me and told me that there was no hope for my husband so they will not try to treat him anymore. I said that I was going to bring him home to the Philippines. I really needed to bring him home because my children called and wanted me to bring their father home. Because all of my children are in the Philippines. I only have one</p> |
|--------------|--------------------------------------------|--------------|----------|-----------------------|-----|--------------------------------------------------------------------------------------------------------------------------------------------------------------------------------------------|-----------------------------------------------------------------------------------------------------------------------------------------------------------------------------------------------------------------------------------------------------------------------------------------------------------------------------------------------------------------------------------------------------------------------------------------------------------------------------------|---------------------------------------------------------------------------------------------------------------------------------------------------------------------------------------------------------------------------------|------------------------------------------------------------------------------------------------------------------------------------------------------------------------------------------------------------------------------------------------------------------------------------------------------------------------------------------------------------------------------------------------------------------------------------------------------------------------------------------------------------------------------------------------------------------------------------|



areas that have more **spacious housing**, but those locations are geographically isolated from transportation and services.

that is here. So I strengthened my insides." "Sometimes I just remember him and I start to cry all of a sudden. But you know, Jesus said that we shouldn't cry because when his second coming comes, we will see our children and our husbands that have already died. And he said that he loves all those that have accepted him in his life. When I read that, my tears roll down my cheeks. I talked to my pastor here. Because some of them wanted to do it in a Catholic church but you have to pay \$200. But with the pastor you don't pay. Anyway, I didn't want a big to-do. In the

|  |  |  |  |  |  |  |  |  |                                                                                                                        |
|--|--|--|--|--|--|--|--|--|------------------------------------------------------------------------------------------------------------------------|
|  |  |  |  |  |  |  |  |  | <p>Philippines it is also the same. So my pastor was there for 2 days, and it's like that in the Philippines too."</p> |
|--|--|--|--|--|--|--|--|--|------------------------------------------------------------------------------------------------------------------------|

|                   |            |                                                                          |          |                                         |           |                                                                                                                                               |                          |                                         |                                                                                                                                                                                                                                                                                                                                                                                                            |
|-------------------|------------|--------------------------------------------------------------------------|----------|-----------------------------------------|-----------|-----------------------------------------------------------------------------------------------------------------------------------------------|--------------------------|-----------------------------------------|------------------------------------------------------------------------------------------------------------------------------------------------------------------------------------------------------------------------------------------------------------------------------------------------------------------------------------------------------------------------------------------------------------|
| ENGLUND<br>, 1998 | Mozambican | not<br>reported                                                          | External | Mozambique                              | Malawi    | The war<br>between the<br>Frelimo<br>government<br>and<br>Renamo<br>rebels,<br>waged in<br>Mozambique<br>from the<br>late 1970s<br>until 1992 | settlements or<br>houses | Death<br>arrangements                   |                                                                                                                                                                                                                                                                                                                                                                                                            |
| Hiruy, 2014       | African    | not<br>reported<br>(in one<br>case<br>study it's<br>a man in<br>his 40s) | External | Africa (with<br>a focus on<br>Ethiopia) | Australia | political<br>conflict, in<br>the 1990s                                                                                                        | not reported             | Access to<br>medical/palliative<br>care | "The Ethiopian<br>tradition<br>demands that 'a<br>man shows<br>courage and<br>resilience no<br>matter what the<br>situation'. This<br>is also<br>strengthened by<br>the religious<br>belief that<br>'death is only a<br>way to a better<br>life – life with<br>your God'.<br>These customs<br>and beliefs seem<br>to have<br>permeated<br>Dagne's<br>contemplation<br>as he dealt with<br>dying on a daily |



|                          |           |          |          |           |         |                    |       |                      |                                                                                                                                                                                                                                                                                                                                                                                                                                                                                                                                                                                          |
|--------------------------|-----------|----------|----------|-----------|---------|--------------------|-------|----------------------|------------------------------------------------------------------------------------------------------------------------------------------------------------------------------------------------------------------------------------------------------------------------------------------------------------------------------------------------------------------------------------------------------------------------------------------------------------------------------------------------------------------------------------------------------------------------------------------|
| Kristiansen et al., 2015 | Palestine | late 50s | External | Palestine | Denmark | occupation-ongoing | house | bereavment narrative | <p>When they told [my husband]: you have cancer. It was a shock for me. [...] Then when the doctor left, I cried, [and] I told my husband 'Please don't leave this life before me, pray for me that Allah will be with me, send me to Allah, send me to Allah, don't go without sending me to Allah'. This is what happened, and I'm sure that he made dua for me because I feel, Alhamdulillah [praise be to God], Allah is really taking care of me every day.</p> <p>"When people they ask me [about this last time with him], I say, I felt it was like honeymoon for me because</p> |
|--------------------------|-----------|----------|----------|-----------|---------|--------------------|-------|----------------------|------------------------------------------------------------------------------------------------------------------------------------------------------------------------------------------------------------------------------------------------------------------------------------------------------------------------------------------------------------------------------------------------------------------------------------------------------------------------------------------------------------------------------------------------------------------------------------------|

|  |  |  |  |  |  |  |  |  |  |                                                                                                                                                                                                                                                                                                                                                                                               |
|--|--|--|--|--|--|--|--|--|--|-----------------------------------------------------------------------------------------------------------------------------------------------------------------------------------------------------------------------------------------------------------------------------------------------------------------------------------------------------------------------------------------------|
|  |  |  |  |  |  |  |  |  |  | before [his illness] we didn't see each other so much. And, SubhanAllah, three days or two days [before he died] he had a mask [for oxygen], he took it off and he said: 'I love you' and then he put it back, 'I love you, do you hear. I am satisfied, may Allah be pleased with you', he made du'a for me. So, until the last moment he was caring about me and [spoke] nice words to me." |
|--|--|--|--|--|--|--|--|--|--|-----------------------------------------------------------------------------------------------------------------------------------------------------------------------------------------------------------------------------------------------------------------------------------------------------------------------------------------------------------------------------------------------|
